# Supplementary material for: Structural Equation Modeling of Common Cognitive Abilities in Preschool-Aged Children Using WPPSI-IV and BRIEF-P
Source: MDPI journal article supplement (doi:10.3390/children9071089), 2022-07-21
Supplement: s1 [file s1]

## Supplementary Materials:

**Table S1.** Descriptive values for BRIEF-P Scales and WPPSI-IV indices and fullscales.

| Indices<br>WPPSI-IV | M      | SD     | min. | max. | < 85<br>n (%) | > 115<br>n (%) |
|---------------------|--------|--------|------|------|---------------|----------------|
| VCI                 | 102.65 | 14.984 | 66   | 132  |               |                |
| VSI                 | 107.51 | 14.815 | 58   | 148  |               |                |
| FRI                 | 106.40 | 16.003 | 74   | 145  |               |                |
| WMI                 | 101.50 | 15.024 | 67   | 146  |               |                |
| PSI                 | 99.83  | 12.281 | 66   | 130  |               |                |
| FSIQ                | 104.94 | 14.341 | 71   | 138  | 12 (9.7)      | 30 (24.2)      |
| VAI                 | 100.74 | 12.956 | 70   | 127  |               |                |
| NVI                 | 105.69 | 15.277 | 73   | 149  |               |                |
| GAI                 | 105.49 | 14.226 | 69   | 141  |               |                |
| CPI                 | 101.02 | 14.338 | 65   | 137  |               |                |
| BRIEF-P<br>Scales   | M      | SD     | min. | max. | > 65<br>n     | percent        |
| WM                  | 48.40  | 9.369  | 37   | 80   | 9             | 7.3            |
| INH                 | 48.56  | 8.846  | 36   | 72   | 8             | 6.5            |
| SH                  | 49.12  | 9.524  | 37   | 78   | 11            | 8.9            |
| EC                  | 47.22  | 9.297  | 35   | 75   | 5             | 4.0            |
| PO                  | 48.57  | 10.190 | 33   | 80   | 7             | 5.6            |
| GEC                 | 48.03  | 9.352  | 33   | 77   | 8             | 6.5            |

Note. VCI—Verbal Comprehension Index, VS—Visual Spatial Index, FRI—Fluid Reasoning Index, WM—Working Memory Index, PSI—Processing Speed Index, FSIQ—Fullscale-IQ; Secondary Indices: VAI—Verbal Acquisition Index, NVI—Nonverbal Index, GAI—General Ability Index, CPI—Cognitive Proficiency Index; WM—Working Memory, INH—Inhibit, SH—Shift, EC= Emotional Control, PO—Plan/Organize, GEC—Global Executive Composite Functioning.

**Table S2.** Descriptive statistics of the indicators within the sample (N = 124).

|                     | M     | SD    | min | max | Kurtosis | c.r.   |
|---------------------|-------|-------|-----|-----|----------|--------|
| Information         | 10.27 | 2.852 | 2   | 18  | 0.535    | 1.197  |
| Similarities        | 10.73 | 3.137 | 2   | 17  | -0.103   | -0.231 |
| Receptiv Vocabulary | 10.57 | 2.777 | 5   | 16  | -0.752   | -1.682 |
| Picture Naming      | 9.76  | 2.748 | 4   | 17  | -0.300   | -0.671 |
| Picture Memory      | 10.21 | 3.264 | 2   | 19  | 0.175    | 0.392  |
| Zoo Location        | 10.27 | 2.795 | 2   | 18  | 0.760    | 1.700  |

|                    |       |        |    |    |        |        |
|--------------------|-------|--------|----|----|--------|--------|
| Block Design       | 11.24 | 3.181  | 3  | 19 | 0.193  | 0.430  |
| Object Assembly    | 11.23 | 2.816  | 2  | 17 | 0.673  | 1.506  |
| Matrix Reasoning   | 11.35 | 3.092  | 3  | 18 | -0.317 | -0.709 |
| Picture Concepts   | 10.85 | 3.311  | 3  | 17 | -0.264 | -0.589 |
| Bug Search         | 10.46 | 2.484  | 3  | 17 | 0.947  | 2.117  |
| Cancellation       | 9.40  | 2.572  | 1  | 16 | 0.635  | 1.420  |
| Working Memory     | 48.40 | 9.369  | 37 | 80 | 0.374  | 0.837  |
| Inhibition         | 48.56 | 8.846  | 36 | 72 | -0.061 | -0.136 |
| Shift              | 49.12 | 9.524  | 37 | 78 | 0.449  | 1.005  |
| Emotional Control  | 47.22 | 9.297  | 35 | 75 | 0.243  | 0.544  |
| Plan/ Organization | 48.57 | 10.190 | 33 | 80 | 0.352  | 0.788  |
| Multivariate       |       |        |    |    | 5.171  | 1.114  |

**Table S3.** Correlation of WPPSI-IV Indices and fullscale IQ and BRIEF-P scales and GEC (N = 124).

Note. Spearman-Rho; \*\*. Correlation is sig. 0.01 level (one-sided); \*. Correlation sig. 0.05 level (one-sided).

[illegible]

|     |         |          |          |         |          |         |         |          |         |         |          |          |         |         |         |         |  |  |  |
|-----|---------|----------|----------|---------|----------|---------|---------|----------|---------|---------|----------|----------|---------|---------|---------|---------|--|--|--|
| RV  | 0.372** | 0.387**  | --       |         |          |         |         |          |         |         |          |          |         |         |         |         |  |  |  |
| PN  | 0.483** | 0.433**  | 0.405**  | --      |          |         |         |          |         |         |          |          |         |         |         |         |  |  |  |
| BD  | 0.200*  | 0.276**  | 0.111    | 0.101   | --       |         |         |          |         |         |          |          |         |         |         |         |  |  |  |
| OA  | 0.181*  | 0.267**  | 0.153*   | 0.066   | 0.417**  | --      |         |          |         |         |          |          |         |         |         |         |  |  |  |
| MR  | 0.268** | 0.294**  | 0.159*   | 0.209*  | 0.516**  | 0.296** | --      |          |         |         |          |          |         |         |         |         |  |  |  |
| PC  | 0.370** | 0.503**  | 0.324**  | 0.226** | 0.455**  | 0.286** | 0.408** | --       |         |         |          |          |         |         |         |         |  |  |  |
| PM  | 0.288** | 0.258**  | 0.116    | 0.129   | 0.280**  | 0.252** | 0.224** | 0.330**  | --      |         |          |          |         |         |         |         |  |  |  |
| ZL  | 0.147   | 0.172*   | 0.217**  | 0.064   | 0.311**  | 0.262** | 0.395** | 0.304**  | 0.357** | --      |          |          |         |         |         |         |  |  |  |
| BS  | 0.225** | 0.314**  | 0.199*   | 0.043   | 0.385**  | 0.211** | 0.360** | 0.396**  | 0.206*  | 0.297** | --       |          |         |         |         |         |  |  |  |
| CA  | 0.167*  | 0.368**  | 0.201*   | 0.095   | 0.290**  | 0.304** | 0.183*  | 0.372**  | 0.168*  | 0.202*  | 0.436**  | --       |         |         |         |         |  |  |  |
| WM  | -0.175* | -0.219** | -0.379** | -0.183* | -0.218** | -0.192* | -0.132  | -0.395** | -0.100  | -0.089  | -0.197*  | -0.341** | --      |         |         |         |  |  |  |
| INH | -0.146  | -0.205*  | -0.341** | -0.054  | -0.121   | -0.112  | -0.184* | -0.336** | -0.095  | -0.112  | -0.227** | -0.253** | 0.656** | --      |         |         |  |  |  |
| SH  | -0.109  | -0.185*  | -0.162*  | -0.166* | -0.088   | -0.087  | -0.065  | -0.207*  | 0.039   | -0.103  | -0.012   | -0.129   | 0.388** | 0.325** | --      |         |  |  |  |
| EC  | -0.045  | -0.208*  | -0.153*  | -0.056  | -0.077   | -0.127  | -0.053  | -0.224** | -0.022  | -0.167* | -0.113   | -0.213** | 0.468** | 0.620** | 0.540** | --      |  |  |  |
| PO  | -0.166* | -0.136   | -0.249** | -0.133  | -0.048   | 0.012   | -0.006  | -0.243** | -0.063  | -0.027  | -0.044   | -0.272** | 0.762** | 0.626** | 0.255** | 0.438** |  |  |  |

Note. Spearman-Rho; \*\*. Correlation is sig. 0.01 level (one-sided); \*. Correlation sig. 0.05 level (one-sided).

**Table S5.** Comparison of estimated parameters of structural relationships with and without control of common method variance.

| Structural relationships<br>explanatory<br>variable (g) | Model without<br>method factor |         | Model with<br>method factor |          |
|---------------------------------------------------------|--------------------------------|---------|-----------------------------|----------|
|                                                         | SRW                            | SMC     | SRW                         | SMC      |
| VCI                                                     |                                | 0.640   |                             | 0.999*   |
| VSI                                                     |                                | 0.850   |                             | 0.605    |
| FRI                                                     |                                | 0.998*  |                             | 0.991*   |
| WMI                                                     |                                | 0.794   |                             | 0.441    |
| PSI                                                     |                                | 0.817   |                             | 0.528    |
| GEC                                                     | -0.427                         | 0.182   | -0.272                      | 0.074    |
| <i>Varinane of g</i>                                    | 0.188                          | p=0.020 | 0.636                       | p= 0.000 |

Note: SRW—Standardized regression weights; SMC—Squared multiple correlation;\* Fixation of error variances to smallest value 0.001.

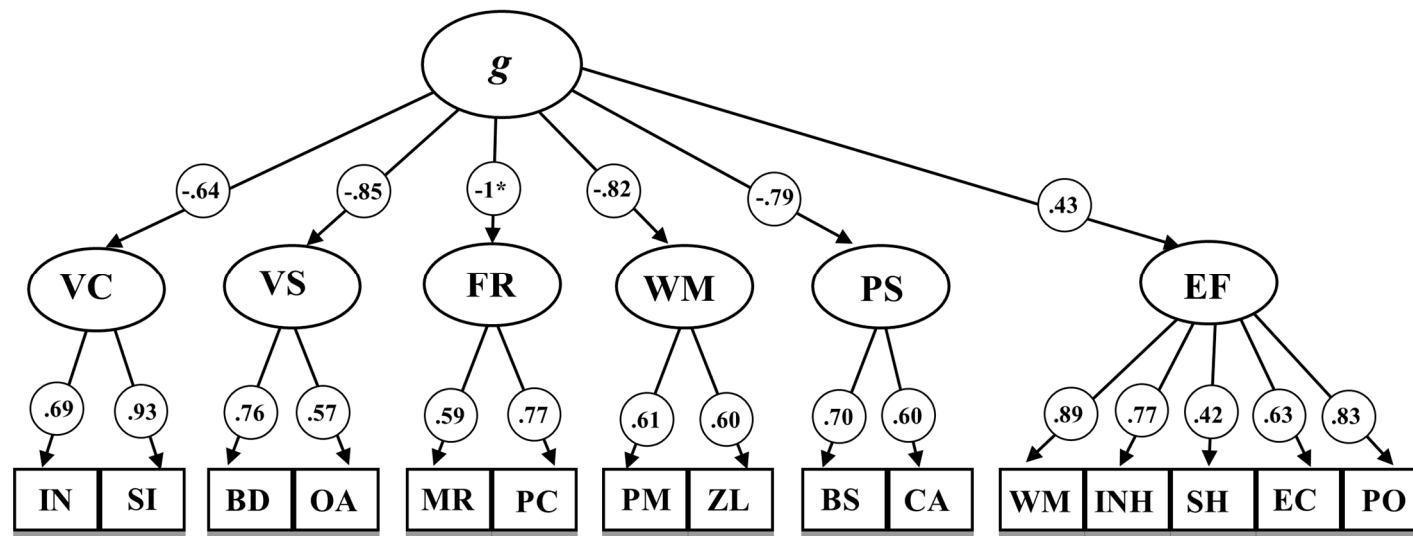

$\chi^2 = 144.419$ ,  $df = 85$ ,  $p = 0.001$ ; CFI = 0.908; RMSEA = 0.075

**Figure S1.** Second-order six-factor model including standardized estimations for the CFA\_1b (N = 124) of the ten WPPSI-IV subtests and five BRIEF-P scales (CFA\_1 in Table 4).

Note. CFA—confirmatory factor analysis; WPPSI-IV—Wechsler Primary and Preschool Scale of Intelligence – fourth edition; IN—Information, SI—Similarities, CO—Comprehension, RV—Receptive Vocabulary, PN—Picture Naming; BD—Block Design, OA—Object Assembly, MR—Matrix Reasoning, PC—Picture Concepts, PM—Picture Memory, ZL—Zoo Locations, BS—Bug Search, CA—Cancellation, VC—Verbal Comprehension, VS—Visual Spatial, FR—Fluid Reasoning, WM—Working Memory, PS—Processing Speed, *g*—General Intelligence;; BRIEF-P scales: WM= Working Memory, INH= Inhibit, SH= Shift, EC= Emotional Control, PO= Plan/Organize, EF= Fullscale Executive Functions;\* Fixation of error variances to smallest value 0.001. All standardized parameter estimates are significant at  $p < 0.001$ .

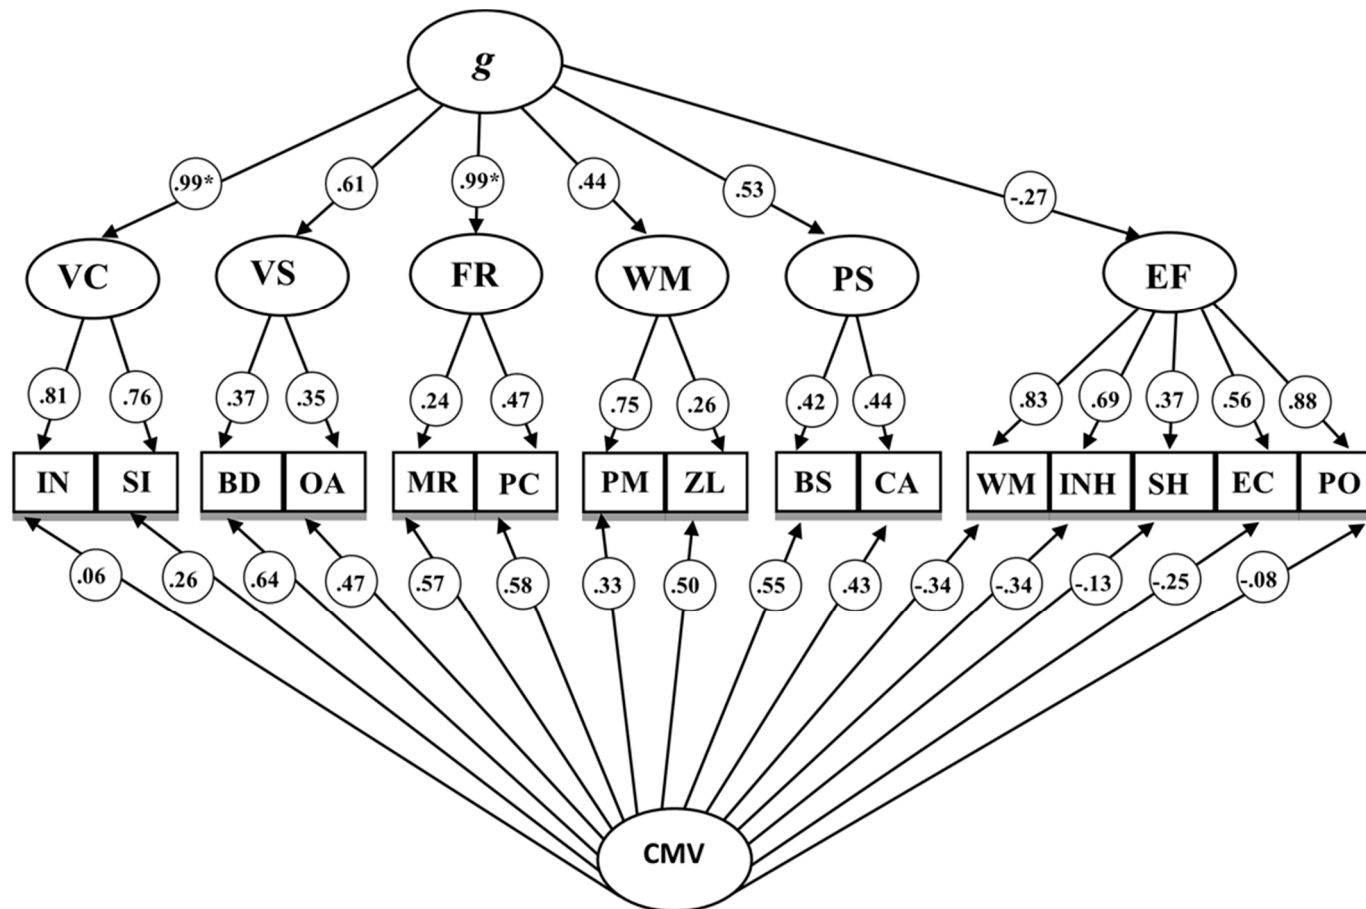

$$\chi^2 = 120.498, df = 71, p = 0.001; CFI = 0.923; RMSEA = 0.075$$

**Figure S2.** Second-order six-factor model including a primary latent method factor, with standardized estimations for the CFA\_cmV, (N = 124) of the ten WPPSI-IV subtests and five BRIEF-P scales (CFA\_1 in Table 5).

**Note.** CFA—Confirmatory factor analysis; WPPSI-IV—Wechsler Primary and Preschool Scale of Intelligence – fourth edition; IN—Information, SI—Similarities, CO—Comprehension, RV—Receptive Vocabulary, PN—Picture Naming; BD—Block Design, OA—Object Assembly, MR—Matrix Reasoning, PC—Picture Concepts, PM—Picture Memory, ZL—Zoo Locations, BS—Bug Search, CA—Cancellation, VC—Verbal Comprehension, VS—Visual Spatial, FR—Fluid Reasoning, WM—Working Memory, PS—Processing Speed, *g*—General Intelligence; BRIEF-P scales: WM= Working Memory, INH= Inhibit, SH= Shift, EC= Emotional Control, PO= Plan/Organize, *EF*= Fullscale Executive Functioning; \* Fixation of error variances to smallest value 0.001. All standardized parameter estimates are significant at  $p < 0.001$ .

**Table S6.** Reliability of the final measurement model.

|                       | vci   |       | vsi   |       | fri   |       | wmi   |       | psi   |       | EF    |       |       |       |       |
|-----------------------|-------|-------|-------|-------|-------|-------|-------|-------|-------|-------|-------|-------|-------|-------|-------|
|                       | IN    | SI    | BD    | OA    | MR    | PC    | PM    | ZL    | BS    | CA    | WM    | INH   | SH    | EC    | PO    |
| Factor reliability    | 0.863 |       | 0.728 |       | 0.792 |       | 0.719 |       | 0.725 |       | 0.869 |       |       |       |       |
| AVE                   | 0.759 |       | 0.579 |       | 0.656 |       | 0.564 |       | 0.572 |       | 0.582 |       |       |       |       |
| IIC                   | 0.639 |       | 0.429 |       | 0.421 |       | 0.364 |       | 0.420 |       | 0.512 |       |       |       |       |
| $\alpha$              | 0.780 |       | 0.600 |       | 0.592 |       | 0.534 |       | 0.592 |       | 0.840 |       |       |       |       |
| Indicator reliability | 0.699 | 0.819 | 0.76  | 0.397 | 0.621 | 0.691 | 0.679 | 0.449 | 0.711 | 0.434 | 0.85  | 0.653 | 0.217 | 0.453 | 0.736 |
| Factor loading        | 0.836 | 0.905 | 0.872 | 0.63  | 0.788 | 0.831 | 0.824 | 0.67  | 0.843 | 0.659 | 0.922 | 0.808 | 0.466 | 0.673 | 0.858 |

Note. N = 124, AVE—Average variance extracted; IIC—Inter-Item Correlation, Abbreviations of factors: vci—Verbal Comprehension Index , vsi—Visual Spatial Index , fri—Fluid Reasoning Index, wmi—Working Memory Index, psi—Processing Speed Index , EF—Executive Function; Abbreviations of subtests of the WPPSI-IV: : IN—Information; SI—Similarities; RV—Receptive Vocabulary; PN—Picture Naming; BD—Block Design; OA—Object Assembly; MR—Matrix Reasoning; PCs—Picture Concepts; PM—Picture Memory; ZLs—Zoo Locations; BS—Bug Search; CA—Cancellation; Abbreviations of the BRIEF-P scales: WM= Working Memory, INH= Inhibit, SH= Shift, EC= Emotional Control, PO—Plan/Organize.

**Table S7.** Frequencies of Inconsistency Scale and Negativity Scale of the BRIEF-P..

| value ranges | inconsistence |         | Neg.-Items | negativity |         |
|--------------|---------------|---------|------------|------------|---------|
|              | frequency     | percent |            | frequency  | percent |
| 0-5          | 54            | 44,1    | 0          | 100        | 81,3    |
| 6-10         | 66            | 54,2    | 1          | 13         | 10,6    |
| $\geq 11$    | 2             | 1,6     | 2          | 7          | 5,7     |
|              |               |         | 3          | 1          | 0,8     |
|              |               |         | 4          | 2          | 1,6     |

Note. Inconsistence scale, n = 122; Negativity scale, n = 123.
